# Supplementary material for: Pepsinogen Serology and Gastritis OLGA Staging in Mucosal Atrophy Assessment: A Cross-Sectional Study Involving East China Endoscopy Population
Source: Hindawi journal article supplement (doi:10.1155/2020/2324505), 2020-04-13
Supplement: f1 [file 2324505.f1.pdf]

| Numb    | BMI   | Gender<br>(male,1;female,2) | Age | Smoking history<br>(Yes,1;No,2) | Alcohol History<br>(Yes,1;No,2) | GC family<br>history<br>(Yes,1;No,2) |
|---------|-------|-----------------------------|-----|---------------------------------|---------------------------------|--------------------------------------|
| Data001 | 23.67 | 1                           | 55  | 2                               | 2                               | 1                                    |
| Data002 | 23.67 | 1                           | 49  | 1                               | 1                               | 1                                    |
| Data003 | 23.03 | 1                           | 52  | 2                               | 1                               | 1                                    |
| Data004 | 23.44 | 2                           | 55  | 1                               | 2                               | 2                                    |
| Data005 | 32.65 | 1                           | 44  | 2                               | 1                               | 1                                    |
| Data006 | 29.41 | 1                           | 40  | 2                               | 2                               | 2                                    |
| Data007 | 21.97 | 1                           | 58  | 1                               | 2                               | 1                                    |
| Data008 | 18.87 | 2                           | 47  | 2                               | 2                               | 2                                    |
| Data009 | 17.09 | 2                           | 56  | 1                               | 2                               | 2                                    |
| Data010 | 29.59 | 1                           | 66  | 2                               | 2                               | 1                                    |
| Data011 | 23.32 | 1                           | 76  | 2                               | 1                               | 2                                    |
| Data012 | 26.27 | 1                           | 67  | 2                               | 1                               | 1                                    |
| Data013 | 24.46 | 2                           | 48  | 2                               | 2                               | 2                                    |
| Data014 | 18.59 | 1                           | 56  | 2                               | 1                               | 1                                    |
| Data015 | 28.38 | 2                           | 51  | 2                               | 2                               | 2                                    |
| Data016 | 26.49 | 2                           | 52  | 2                               | 2                               | 1                                    |
| Data017 | 26.08 | 1                           | 62  | 2                               | 1                               | 2                                    |
| Data018 | 22.99 | 1                           | 57  | 1                               | 1                               | 1                                    |
| Data019 | 23.44 | 2                           | 70  | 1                               | 2                               | 2                                    |
| Data020 | 22.49 | 1                           | 27  | 2                               | 1                               | 1                                    |
| Data021 | 25.18 | 1                           | 36  | 2                               | 1                               | 2                                    |
| Data022 | 35.69 | 1                           | 36  | 2                               | 2                               | 2                                    |
| Data023 | 29.07 | 1                           | 44  | 2                               | 1                               | 1                                    |
| Data024 | 22.49 | 1                           | 45  | 1                               | 1                               | 1                                    |
| Data025 | 23.5  | 2                           | 47  | 2                               | 2                               | 2                                    |
| Data026 | 34.11 | 2                           | 49  | 1                               | 2                               | 2                                    |
| Data027 | 31.16 | 2                           | 50  | 1                               | 2                               | 2                                    |
| Data028 | 21.88 | 1                           | 52  | 2                               | 2                               | 1                                    |
| Data029 | 24.91 | 2                           | 56  | 2                               | 2                               | 2                                    |
| Data030 | 21.63 | 1                           | 32  | 1                               | 2                               | 1                                    |
| Data031 | 29.74 | 1                           | 42  | 2                               | 1                               | 1                                    |
| Data032 | 22.32 | 2                           | 42  | 2                               | 2                               | 1                                    |
| Data033 | 26.67 | 2                           | 45  | 1                               | 2                               | 2                                    |
| Data034 | 21.05 | 1                           | 46  | 1                               | 2                               | 1                                    |
| Data035 | 20.45 | 2                           | 50  | 2                               | 2                               | 2                                    |
| Data036 | 25.95 | 1                           | 52  | 1                               | 1                               | 1                                    |
| Data037 | 22.49 | 1                           | 55  | 2                               | 2                               | 1                                    |
| Data038 | 20.94 | 2                           | 61  | 1                               | 2                               | 2                                    |
| Data039 | 22.66 | 2                           | 63  | 2                               | 2                               | 2                                    |
| Data040 | 23.67 | 1                           | 55  | 2                               | 1                               | 1                                    |
| Data041 | 29.53 | 2                           | 50  | 2                               | 2                               | 2                                    |

|         |       |      |    |   |   |   |
|---------|-------|------|----|---|---|---|
| Data042 | 23.51 | 1    | 51 | 2 | 2 | 2 |
| Data043 | 30.4  | 1    | 45 | 2 | 2 | 1 |
| Data044 | 27.68 | 1    | 72 | 2 | 2 | 2 |
| Data045 | 23.12 | 1    | 40 | 2 | 1 | 1 |
| Data046 | 24.89 | 2    | 49 | 2 | 2 | 2 |
| Data047 | 25.31 | 2    | 63 | 2 | 2 | 2 |
| Data048 | 29.53 | 2    | 43 | 2 | 2 | 2 |
| Data049 | 22.31 | 2    | 60 | 2 | 2 | 2 |
| Data050 | 23.5  | 2    | 80 | 2 | 2 | 1 |
| Data051 | 20.4  | 2    | 64 | 2 | 2 | 2 |
| Data052 | 29.73 | 1    | 67 | 1 | 2 | 2 |
| Data053 | 21.8  | 1    | 65 | 1 | 1 | 2 |
| Data054 | 24.16 | 1    | 51 | 2 | 2 | 1 |
| Data055 | 25.22 | 1    | 64 | 2 | 2 | 2 |
| Data056 | 24.02 | 1    | 45 | 2 | 1 | 1 |
| Data057 | 27.68 | 1    | 51 | 2 | 2 | 1 |
| Data058 | 26.3  | 1    | 52 | 2 | 1 | 1 |
| Data059 | 22.6  | 1    | 61 | 2 | 2 | 1 |
| Data060 | 22.06 | 2    | 42 | 2 | 2 | 2 |
| Data061 |       | 1    | 46 | 1 | 1 | 2 |
| Data062 | 24.51 | 1    | 46 | 2 | 2 | 1 |
| Data063 | 20.03 | 2    | 47 | 2 | 2 | 2 |
| Data064 | 22.89 | 2    | 53 | 2 | 2 | 1 |
| Data065 | 22.86 | 1    | 63 | 1 | 1 | 1 |
| Data066 | 20.2  | 1    | 71 | 2 | 2 | 2 |
| Data067 | 28.69 | 2    | 60 | 2 | 2 | 2 |
| Data068 | 26.73 | 1    | 43 | 1 | 2 | 1 |
| Data069 | 23.67 | 1    | 46 | 2 | 2 | 2 |
| Data070 | 25.06 | 1    | 48 | 2 | 2 | 1 |
| Data071 | 29.78 | 2    | 49 | 2 | 2 | 2 |
| Data072 | 27.34 | 2    | 50 | 2 | 2 | 2 |
| Data073 | 26.89 | 1    | 51 | 1 | 2 | 1 |
| Data074 | 26.67 | 2    | 51 | 2 | 2 | 2 |
| Data075 | 22.04 | 1    | 69 | 2 | 1 | 2 |
| Data076 | 21.51 | 1    | 74 | 2 | 2 | 2 |
| Data077 | 22.04 | 2    | 60 | 1 | 2 | 2 |
| Data078 | 24.24 | 2    | 35 | 2 | 2 | 2 |
| Data079 | 25.97 | 1.00 | 41 | 1 | 1 | 2 |
| Data080 | 26.45 | 1    | 52 | 2 | 1 | 1 |
| Data081 | 21.48 | 2    | 53 | 2 | 2 | 2 |
| Data082 | 24.49 | 1    | 37 | 2 | 2 | 2 |
| Data083 | 29.88 | 1    | 38 | 1 | 2 | 1 |
| Data084 | 21.19 | 2    | 27 | 2 | 2 | 2 |

|         |       |      |    |   |   |   |
|---------|-------|------|----|---|---|---|
| Data085 | 22.19 | 2    | 41 | 2 | 2 | 2 |
| Data086 | 24.61 | 2    | 46 | 2 | 2 | 2 |
| Data087 | 28.65 | 1    | 47 | 2 | 1 | 2 |
| Data088 | 30.82 | 2    | 48 | 1 | 2 | 2 |
| Data089 | 18.29 | 2    | 61 | 1 | 2 | 1 |
| Data090 | 22.64 | 2    | 62 | 2 | 2 | 2 |
| Data091 | 19.59 | 1    | 44 | 1 | 2 | 2 |
| Data092 | 22.04 | 2    | 58 | 1 | 1 | 1 |
| Data093 | 23.3  | 2    | 40 | 2 | 2 | 2 |
| Data094 | 26.79 | 1    | 40 | 1 | 1 | 2 |
| Data095 |       | 1    | 52 | 1 | 2 | 2 |
| Data096 |       | 1    | 37 | 1 | 1 | 2 |
| Data097 | 17.63 | 1    | 25 | 1 | 2 | 2 |
| Data098 | 22.6  | 2    | 70 | 2 | 2 | 2 |
| Data099 |       | 1    | 57 | 1 | 1 | 2 |
| Data100 | 19.79 | 2    | 47 | 2 | 2 | 2 |
| Data101 | 20.6  | 2    | 47 | 2 | 2 | 2 |
| Data102 |       | 1    | 51 | 1 | 1 | 2 |
| Data103 | 23.96 | 1    | 43 | 1 | 1 | 2 |
| Data104 | 19.31 | 2    | 38 | 2 | 2 | 2 |
| Data105 | 21.44 | 2    | 46 | 2 | 2 | 2 |
| Data106 | 23.23 | 2    | 48 | 2 | 2 | 1 |
| Data107 | 27.83 | 1    | 50 | 2 | 2 | 2 |
| Data108 | 23.26 | 1    | 52 | 2 | 2 | 2 |
| Data109 | 21.65 | 1    | 57 | 2 | 2 | 2 |
| Data110 | 29.79 | 2    | 53 | 2 | 2 | 2 |
| Data111 | 24    | 1    | 72 | 1 | 1 | 2 |
| Data112 |       | 2    | 60 | 2 | 2 | 1 |
| Data113 | 28.18 | 2    | 64 | 2 | 2 | 2 |
| Data114 | 29    | 2    | 65 | 2 | 2 | 2 |
| Data115 | 23.98 | 1    | 60 | 1 | 1 | 2 |
| Data116 | 21    | 1    | 51 | 1 | 1 | 2 |
| Data117 | 24.8  | 1    | 47 | 2 | 2 | 1 |
| Data118 | 29    | 1    | 38 | 2 | 2 | 1 |
| Data119 | 22.64 | 1    | 43 | 1 | 1 | 2 |
| Data120 | 21.91 | 2    | 29 | 2 | 2 | 2 |
| Data121 | 20.76 | 1    | 41 | 1 | 2 | 2 |
| Data122 | 20    | 1    | 35 | 2 | 2 | 2 |
| Data123 | 30.23 | 1    | 36 | 1 | 1 | 2 |
| Data124 | 24.19 | 1    | 40 | 2 | 2 | 2 |
| Data125 | 23.85 | 1    | 41 | 2 | 2 | 2 |
| Data126 |       | 1.00 | 44 | 1 | 1 | 2 |
| Data127 | 16.22 | 2    | 30 | 2 | 2 | 2 |
| Data128 | 22.14 | 2    | 30 | 2 | 2 | 2 |

|         |       |      |    |   |   |   |
|---------|-------|------|----|---|---|---|
| Data129 | 25.48 | 2    | 31 | 1 | 2 | 2 |
| Data130 |       | 1    | 41 | 1 | 1 | 2 |
| Data131 | 24.12 | 2    | 36 | 2 | 2 | 2 |
| Data132 | 24.47 | 2    | 37 | 2 |   | 2 |
| Data133 |       | 2    | 40 | 2 | 2 | 1 |
| Data134 | 28.43 | 2    | 45 | 2 | 2 | 1 |
| Data135 | 20.28 | 2    | 45 | 2 | 2 | 2 |
| Data136 |       | 1    | 46 | 1 | 1 | 2 |
| Data137 | 22.89 | 2    | 46 | 1 | 2 | 2 |
| Data138 | 24.17 | 1    | 49 | 2 | 2 | 2 |
| Data139 | 26.06 | 2    | 50 | 2 | 2 | 2 |
| Data140 | 26.37 | 2    | 51 | 2 | 2 | 2 |
| Data141 | 25.21 | 2    | 54 | 2 | 2 | 2 |
| Data142 | 30.32 | 2    | 57 | 2 | 2 | 2 |
| Data143 | 28.6  | 1    | 52 | 1 | 1 | 2 |
| Data144 |       | 2    | 61 | 2 | 2 | 2 |
| Data145 |       | 2.00 | 66 | 2 | 2 | 2 |
| Data146 | 25    | 1    | 60 | 1 | 1 | 2 |
| Data147 | 24.21 | 1    | 65 | 1 | 1 | 2 |
| Data148 | 21.67 | 2    | 29 | 1 | 2 | 2 |
| Data149 | 24.13 | 2    | 38 | 2 | 2 | 1 |
| Data150 | 22.35 | 2    | 40 | 2 | 2 | 2 |
| Data151 |       | 2    | 40 | 2 | 2 | 2 |
| Data152 | 22.07 | 2    | 44 | 2 | 2 | 2 |
| Data153 | 28.9  | 1    | 37 | 2 | 2 | 2 |
| Data154 |       | 1    | 41 | 1 | 1 | 1 |
| Data155 |       | 2    | 28 | 2 | 2 | 2 |
| Data156 | 22.01 | 2    | 39 | 2 | 2 | 2 |
| Data157 | 17.9  | 1    | 46 | 1 | 1 | 2 |
| Data158 | 20.48 | 1    | 47 | 2 | 1 | 1 |
| Data159 | 27.2  | 2    | 48 | 2 | 2 | 2 |
| Data160 | 22.97 | 1    | 50 | 1 | 1 | 2 |
| Data161 | 24.22 | 1    | 51 | 2 | 2 | 1 |
| Data162 | 26.27 | 1    | 55 | 1 | 1 | 2 |
| Data163 | 22.66 | 2    | 52 | 2 | 2 | 2 |
| Data164 | 25.16 | 2    | 52 | 2 | 2 | 2 |
| Data165 | 22.27 | 2    | 58 | 2 | 2 | 2 |
| Data166 | 22.41 | 2    | 63 | 2 | 2 | 1 |
| Data167 | 24.22 | 2    | 71 | 2 | 2 | 2 |
| Data168 | 21.44 | 2    | 70 | 2 | 2 | 2 |
| Data169 | 24.22 | 2    | 55 | 2 | 2 | 2 |
| Data170 |       | 1    | 42 | 2 | 2 | 2 |
| Data171 | 20.44 | 1    | 44 | 2 | 1 | 2 |
| Data172 | 23.14 | 2    | 46 | 1 | 2 | 2 |

|         |       |   |    |   |   |   |
|---------|-------|---|----|---|---|---|
| Data173 | 25.71 | 1 | 70 | 2 | 1 | 1 |
| Data174 | 22.27 | 2 | 48 | 2 | 1 | 2 |
| Data175 | 29.04 | 1 | 50 | 2 | 2 | 1 |
| Data176 | 24.31 | 2 | 61 | 2 | 2 | 2 |
| Data177 | 21.38 | 1 | 74 | 1 | 1 | 1 |
| Data178 | 24.61 | 1 | 47 | 1 | 2 | 2 |
| Data179 | 25.71 | 1 | 61 | 1 | 1 | 2 |
| Data180 | 22.65 | 1 | 38 | 2 | 2 | 1 |
| Data181 | 23.51 | 1 | 48 | 1 | 2 | 2 |
| Data182 | 23.66 | 1 | 49 | 2 | 1 | 2 |
| Data183 | 26.26 | 2 | 50 | 1 | 2 | 1 |
| Data184 | 19.63 | 2 | 49 | 2 | 2 | 2 |
| Data185 | 20.83 | 2 | 53 | 1 | 2 | 2 |
| Data186 | 23.66 | 1 | 61 | 2 | 1 | 1 |
| Data187 | 25.97 | 2 | 61 | 2 | 2 | 2 |
| Data188 | 34.16 | 1 | 60 | 1 | 2 | 2 |
| Data189 | 18.37 | 2 | 70 | 2 | 2 | 2 |
| Data190 | 29.67 | 1 | 46 | 1 | 2 | 2 |
| Data191 | 20.76 | 1 | 50 | 1 | 1 | 2 |
| Data192 | 19.82 | 1 | 53 | 1 | 2 | 2 |
| Data193 | 28.41 | 1 | 55 | 2 | 1 | 1 |
| Data194 | 27.68 | 1 | 44 | 1 | 2 | 1 |
| Data195 | 24.22 | 1 | 43 | 2 | 1 | 1 |
| Data196 | 20.96 | 2 | 44 | 2 | 2 | 2 |
| Data197 | 20.9  | 1 | 58 | 1 | 1 | 1 |
| Data198 | 24.14 | 2 | 63 | 1 | 2 | 2 |
| Data199 | 23.44 | 2 | 61 | 1 | 2 | 2 |
| Data200 | 19.29 | 2 | 62 | 2 | 2 | 2 |
| Data201 | 17.3  | 1 | 65 | 1 | 2 | 1 |
| Data202 | 25.83 | 1 | 66 | 1 | 1 | 1 |
| Data203 | 24.09 | 2 | 70 | 1 | 2 | 2 |
| Data204 | 22.76 | 1 | 53 | 1 | 2 | 1 |
| Data205 | 24.96 | 1 | 46 | 2 | 1 | 2 |
| Data206 | 23.83 | 1 | 47 | 1 | 1 | 1 |
| Data207 | 20.31 | 1 | 55 | 2 | 2 | 1 |
| Data208 | 24.22 | 1 | 55 | 1 | 2 | 2 |
| Data209 | 22.06 | 1 | 47 | 1 | 2 | 2 |
| Data210 | 20.52 | 1 | 51 | 2 | 1 | 1 |
| Data211 | 23.63 | 1 | 58 | 1 | 1 | 1 |
| Data212 | 18.67 | 2 | 64 | 2 | 2 | 2 |
| Data213 | 19.26 | 1 | 44 | 2 | 2 | 1 |
| Data214 | 27.89 | 2 | 61 | 2 | 2 | 2 |
| Data215 | 23.03 | 1 | 50 | 1 | 1 | 1 |
| Data216 | 23.05 | 2 | 50 | 1 | 2 | 2 |

|         |       |   |    |   |   |   |
|---------|-------|---|----|---|---|---|
| Data217 | 18.67 | 2 | 45 | 2 | 2 | 2 |
| Data218 | 23.67 | 1 | 80 | 2 | 1 | 2 |
| Data219 | 19.14 | 2 | 69 | 2 | 2 | 2 |
| Data220 | 20.89 | 2 | 76 | 2 | 2 | 1 |
| Data221 | 24.73 | 1 | 46 | 2 | 2 | 1 |
| Data222 | 25.06 | 1 | 49 | 2 | 1 | 1 |
| Data223 | 21.94 | 2 | 34 | 2 | 2 | 2 |
| Data224 | 22.65 | 1 | 52 | 1 | 2 | 2 |
| Data225 | 22.41 | 1 | 76 | 1 | 1 | 2 |
| Data226 |       | 1 | 46 | 2 | 2 |   |
| Data227 | 20.6  | 2 | 53 | 2 | 2 | 2 |
| Data228 | 23.52 | 2 | 52 | 2 | 2 | 2 |
| Data229 | 25.1  | 1 | 58 | 1 | 1 | 2 |
| Data230 | 24.14 | 1 | 62 | 2 | 2 | 2 |
| Data231 | 22.52 | 1 | 60 | 1 | 1 | 2 |
| Data232 | 25.95 | 2 | 60 | 2 | 2 | 2 |
| Data233 | 22    | 1 | 39 | 2 | 2 | 1 |
| Data234 | 21.03 | 2 | 43 | 1 | 1 | 2 |
| Data235 | 19.98 | 1 | 35 | 2 | 2 | 2 |
| Data236 |       | 1 | 64 | 1 | 1 | 2 |
| Data237 | 26.11 | 1 | 35 | 2 | 2 | 2 |
| Data238 | 30.44 | 2 | 49 | 2 | 2 | 2 |
| Data239 | 26.92 | 2 | 37 | 1 | 1 | 2 |
| Data240 | 26.56 | 2 | 48 | 2 | 1 | 2 |
| Data241 | 23.45 | 1 | 50 | 2 | 2 | 1 |
| Data242 | 24.78 | 2 | 51 | 2 | 2 | 2 |
| Data243 | 23.5  | 2 | 60 | 1 | 1 | 2 |
| Data244 | 25.83 | 1 | 26 | 1 | 1 | 2 |
| Data245 |       | 2 | 41 | 2 | 2 | 2 |
| Data246 | 22.85 | 2 | 36 | 2 | 2 | 2 |
| Data247 | 23.69 | 1 | 46 | 1 | 1 | 2 |
| Data248 | 22.3  | 1 | 52 | 2 | 2 | 2 |
| Data249 | 17.98 | 1 | 54 | 1 | 1 | 2 |
| Data250 | 29.37 | 1 | 53 | 1 | 1 | 2 |
| Data251 | 19.73 | 2 | 66 | 2 | 2 | 2 |
| Data252 | 20.12 | 2 | 64 | 2 | 2 | 2 |
| Data253 | 21.19 | 1 | 65 | 2 | 2 | 2 |
| Data254 | 21.51 | 1 | 69 | 1 | 2 | 1 |
| Data255 | 23.6  | 2 | 46 | 2 | 2 | 2 |
| Data256 | 19.65 | 2 | 53 | 2 | 2 | 2 |
| Data257 | 29.75 | 1 | 49 | 2 | 1 | 1 |
| Data258 | 22.15 | 1 | 72 | 2 | 2 | 1 |
| Data259 | 23.39 | 1 | 66 | 1 | 2 | 1 |
| Data260 | 21.88 | 1 | 53 | 2 | 1 | 2 |

|         |       |   |    |   |   |   |
|---------|-------|---|----|---|---|---|
| Data261 | 21.34 | 2 | 53 | 2 | 2 | 1 |
| Data262 | 23.01 | 2 | 56 | 1 | 2 | 2 |
| Data263 | 22.77 | 2 | 47 | 1 | 2 | 2 |
| Data264 | 21.97 | 1 | 40 | 1 | 2 | 2 |
| Data265 | 26.58 | 1 | 54 | 1 | 1 | 1 |
| Data266 | 17.53 | 2 | 54 | 1 | 2 | 2 |
| Data267 | 22.49 | 1 | 70 | 2 | 1 | 2 |
| Data268 | 20.2  | 2 | 42 | 2 | 2 | 2 |
| Data269 | 21.09 | 2 | 53 | 1 | 2 | 2 |
| Data270 | 27.56 | 2 | 64 | 2 | 2 | 2 |
| Data271 | 24.03 | 2 | 51 | 2 | 2 | 2 |
| Data272 | 21.72 | 1 | 42 | 2 | 1 | 2 |
| Data273 | 28.67 | 2 | 36 | 2 | 2 | 2 |
| Data274 | 23.44 | 2 | 49 | 2 | 2 | 2 |
| Data275 | 22.06 | 2 | 50 | 2 | 2 | 2 |
| Data276 | 21.97 | 1 | 54 | 2 | 1 | 1 |
| Data277 | 24.22 | 1 | 42 | 2 | 2 | 1 |
| Data278 | 20.28 | 2 | 62 | 2 | 2 | 1 |
| Data279 | 26.95 | 2 | 41 | 2 | 2 | 2 |
| Data280 | 22.91 | 1 | 45 | 2 | 1 | 2 |
| Data281 | 23.31 | 2 | 52 | 1 | 2 | 2 |
| Data282 | 23.83 | 2 | 54 | 2 | 2 | 2 |
| Data283 | 21.5  | 1 | 59 | 2 | 1 | 2 |
| Data284 | 21.8  | 1 | 62 | 2 | 2 | 2 |
| Data285 | 30.06 | 2 | 62 | 2 | 2 | 2 |
| Data286 | 22.51 | 2 | 64 | 2 | 2 | 2 |
| Data287 | 26.67 | 2 | 50 | 2 | 2 | 2 |
| Data288 | 22.86 | 1 | 54 | 2 | 1 | 1 |
| Data289 | 20.52 | 1 | 41 | 2 | 1 | 1 |
| Data290 | 21.64 | 2 | 60 | 1 | 2 | 2 |
| Data291 | 22.66 | 2 | 45 | 2 | 2 | 2 |
| Data292 | 25.71 | 2 | 61 | 1 | 2 | 1 |
| Data293 | 21.51 | 1 | 44 | 2 | 1 | 1 |
| Data294 | 26.85 | 1 | 63 | 1 | 2 | 1 |
| Data295 | 27.77 | 1 | 43 | 2 | 1 | 2 |
| Data296 | 24.91 | 1 | 58 | 2 | 1 | 2 |
| Data297 | 18.37 | 2 | 74 | 1 | 2 | 2 |
| Data298 | 22.04 | 2 | 40 | 1 | 2 | 2 |
| Data299 | 20.08 | 2 | 46 | 2 | 2 | 2 |
| Data300 | 20.76 | 1 | 48 | 2 | 1 | 1 |
| Data301 | 22.6  | 2 | 39 | 2 | 2 | 1 |
| Data302 | 26.95 | 1 | 47 | 2 | 1 | 1 |
| Data303 | 25.53 | 1 | 46 | 2 | 1 | 1 |
| Data304 | 22.04 | 1 | 48 | 2 | 1 | 1 |

|         |       |      |    |   |   |   |
|---------|-------|------|----|---|---|---|
| Data305 | 20.2  | 1    | 54 | 2 | 1 | 1 |
| Data306 | 24.98 | 1    | 58 | 1 | 1 | 1 |
| Data307 |       | 1    | 43 | 2 | 2 | 1 |
| Data308 |       | 1    | 47 | 2 | 2 | 2 |
| Data309 | 23.27 | 1    | 53 | 1 | 1 | 2 |
| Data310 | 28.54 | 1    | 29 | 2 | 2 | 2 |
| Data311 | 26.7  | 1    | 53 | 2 | 1 | 1 |
| Data312 | 26.12 | 1    | 75 | 2 | 2 | 2 |
| Data313 | 24    | 1    | 22 | 2 | 2 | 2 |
| Data314 | 25.33 | 1    | 37 | 1 | 1 | 2 |
| Data315 | 20    | 2    | 44 | 2 | 2 | 2 |
| Data316 | 27.67 | 2.00 | 42 | 2 | 2 | 2 |
| Data317 | 22.27 | 2    | 40 | 1 | 2 | 2 |
| Data318 | 23.65 | 1    | 44 | 2 | 2 | 2 |
| Data319 | 21.91 | 2.00 | 44 | 2 | 2 | 2 |
| Data320 | 24.67 | 1    | 43 | 1 | 1 | 2 |
| Data321 | 29.04 | 1    | 39 | 2 | 2 | 2 |
| Data322 |       | 1    | 45 | 1 | 1 | 2 |
| Data323 | 31.24 | 1    | 45 | 1 | 1 | 2 |
| Data324 | 25.64 | 1    | 45 | 2 | 2 | 1 |
| Data325 | 22.51 | 1    | 46 | 1 | 1 | 2 |
| Data326 | 22.51 | 1    | 49 | 1 | 1 | 2 |
| Data327 | 24.93 | 1    | 49 | 1 | 1 | 2 |
| Data328 | 27.96 | 1    | 49 | 1 | 1 | 2 |
| Data329 | 23.54 | 1    | 49 | 2 | 1 | 2 |
| Data330 | 24.12 | 1    | 53 | 1 | 1 | 2 |
| Data331 |       | 2    | 53 | 2 | 2 | 2 |
| Data332 | 26.6  | 2    | 54 | 1 | 1 | 2 |
| Data333 | 26.67 | 1    | 58 | 1 | 1 | 2 |
| Data334 |       | 2    | 64 | 2 | 1 | 2 |
| Data335 | 21.92 | 2    | 61 | 2 | 2 | 2 |
| Data336 | 24.3  | 1    | 46 | 1 | 1 | 2 |
| Data337 |       | 2    | 46 | 2 | 2 | 1 |
| Data338 |       | 1.00 | 47 | 1 | 1 | 2 |
| Data339 | 21.66 | 2    | 47 | 2 | 2 | 2 |
| Data340 | 21.16 | 2    | 47 | 2 | 2 | 2 |
| Data341 | 27.36 | 1    | 51 | 2 | 2 | 2 |
| Data342 | 28.72 | 1    | 56 | 2 | 2 | 2 |
| Data343 | 21.05 | 1    | 54 | 1 | 2 | 1 |
| Data344 | 24.66 | 1    | 63 | 1 | 1 | 2 |
| Data345 | 22.71 | 1    | 58 | 2 | 1 | 2 |
| Data346 | 25.5  | 2    | 61 | 2 | 2 | 1 |
| Data347 | 24.24 | 1    | 68 | 1 | 1 | 2 |
| Data348 | 28.73 | 1    | 51 | 2 | 1 | 2 |



|         |       |   |    |   |   |   |
|---------|-------|---|----|---|---|---|
| Data349 | 26.8  | 1 | 48 | 2 | 2 | 2 |
| Data350 | 23.41 | 1 | 44 | 2 | 2 | 2 |
| Data351 | 21.71 | 2 | 43 | 2 | 2 | 2 |
| Data352 | 18.7  | 2 | 46 | 2 | 2 | 2 |
| Data353 | 25.73 | 1 | 49 | 2 | 2 | 2 |
| Data354 | 22.76 | 1 | 57 | 1 | 1 | 2 |
| Data355 | 25.79 | 1 | 54 | 1 | 1 | 1 |
| Data356 | 23.61 | 1 | 54 | 1 | 1 | 2 |
| Data357 | 24.44 | 1 | 55 | 2 | 2 | 1 |
| Data358 | 27.55 | 2 | 55 | 1 | 2 | 2 |
| Data359 | 20.86 | 2 | 52 | 2 | 2 | 2 |
| Data360 |       | 1 | 63 | 1 | 1 | 2 |
| Data361 | 22.9  | 1 | 59 | 1 | 2 | 1 |
| Data362 | 26.4  | 1 | 44 | 2 | 2 | 2 |
| Data363 | 21.12 | 1 | 36 | 2 | 2 | 2 |
| Data364 | 23.44 | 2 | 40 | 1 | 2 | 2 |
| Data365 | 21.81 | 2 | 42 | 2 | 2 | 2 |
| Data366 | 21.22 | 1 | 36 | 1 | 1 | 2 |
| Data367 | 21.28 | 2 | 45 | 2 | 2 | 2 |
| Data368 |       | 2 | 46 | 2 | 2 | 2 |
| Data369 |       | 1 | 47 | 1 | 2 | 2 |
| Data370 |       | 1 | 49 | 1 | 2 | 2 |
| Data371 |       | 1 | 53 | 1 | 1 | 2 |
| Data372 | 27.88 | 1 | 57 | 1 | 1 | 2 |
| Data373 | 22.5  | 1 | 52 | 2 | 1 | 1 |
| Data374 | 30.16 | 1 | 52 | 2 | 1 | 2 |
| Data375 | 22.19 | 2 | 51 | 1 | 2 | 1 |
| Data376 | 26.5  | 1 | 51 | 1 | 1 | 2 |
| Data377 |       | 1 | 57 | 2 | 2 | 2 |
| Data378 | 24.03 | 2 | 58 | 1 | 2 | 2 |
| Data379 |       | 2 | 64 | 1 | 1 | 1 |
| Data380 | 21.96 | 1 | 53 | 1 | 1 | 2 |
| Data381 | 20.76 | 1 | 53 | 2 | 2 | 1 |
| Data382 | 22.21 | 2 | 61 | 2 | 2 | 2 |
| Data383 | 24.61 | 2 | 40 | 2 | 2 | 2 |
| Data384 | 20.81 | 2 | 68 | 1 | 2 | 2 |
| Data385 | 29.76 | 1 | 52 | 2 | 1 | 1 |
| Data386 | 19.53 | 2 | 44 | 1 | 2 | 2 |
| Data387 | 24.22 | 1 | 54 | 2 | 2 | 1 |
| Data388 | 23.42 | 2 | 54 | 2 | 2 | 2 |
| Data389 | 20.52 | 1 | 61 | 2 | 2 | 2 |
| Data390 | 25.28 | 1 | 52 | 2 | 1 | 2 |
| Data391 | 25.5  | 1 | 65 | 1 | 1 | 1 |
| Data392 | 20.98 | 1 | 48 | 2 | 1 | 1 |

|         |       |      |    |   |   |   |
|---------|-------|------|----|---|---|---|
| Data393 | 31.93 | 2    | 51 | 2 | 2 | 2 |
| Data394 | 24.77 | 1    | 54 | 2 | 1 | 1 |
| Data395 | 24.03 | 2    | 59 | 2 | 2 | 2 |
| Data396 | 22.03 | 2    | 66 | 1 | 2 | 2 |
| Data397 | 25.04 | 1    | 46 | 2 | 2 | 2 |
| Data398 | 24.22 | 1    | 53 | 1 | 1 | 2 |
| Data399 | 21.72 | 2    | 77 | 2 | 2 | 2 |
| Data400 | 18.79 | 1    | 56 | 2 | 1 | 1 |
| Data401 | 19.59 | 1    | 44 | 2 | 1 | 2 |
| Data402 | 22.89 | 2    | 64 | 2 | 2 | 2 |
| Data403 | 25.96 | 1    | 42 | 2 | 1 | 1 |
| Data404 | 23.14 | 1    | 63 | 2 | 1 | 1 |
| Data405 | 24.9  | 1    | 54 | 2 | 2 | 2 |
| Data406 | 21.76 | 1    | 36 | 1 | 1 | 2 |
| Data407 | 23.21 | 2    | 45 | 1 | 1 | 1 |
| Data408 | 27.44 | 2    | 50 | 2 | 2 | 2 |
| Data409 | 27.12 | 1    | 53 | 2 | 2 | 2 |
| Data410 | 23.94 | 2    | 53 | 2 | 2 | 2 |
| Data411 | 23.74 | 2    | 46 | 1 | 1 | 1 |
| Data412 | 22.21 | 1    | 56 | 1 | 1 | 2 |
| Data413 | 26.2  | 1    | 51 | 1 | 1 | 2 |
| Data414 | 30.01 | 1    | 52 | 2 | 2 | 2 |
| Data415 | 29.93 | 1    | 62 | 2 | 2 | 2 |
| Data416 | 16.22 | 1    | 57 | 1 | 1 | 2 |
| Data417 |       | 1.00 | 36 | 1 | 1 | 2 |
| Data418 | 22.96 | 2    | 43 | 2 | 2 | 2 |
| Data419 | 21.08 | 2    | 50 | 2 | 2 | 2 |
| Data420 | 20.85 | 2    | 51 | 2 | 2 | 2 |
| Data421 | 24.7  | 1    | 62 | 1 | 1 | 2 |
| Data422 |       | 1    | 34 | 2 | 1 | 2 |
| Data423 | 29.77 | 1    | 35 | 1 | 1 | 1 |
| Data424 | 20.56 | 2    | 46 | 2 | 1 | 2 |
| Data425 | 21.91 | 2    | 47 | 2 | 2 | 2 |
| Data426 | 26.12 | 1    | 48 | 1 | 1 | 2 |
| Data427 |       | 1    | 50 | 1 | 1 | 2 |
| Data428 | 21.9  | 2    | 55 | 2 | 2 | 2 |
| Data429 |       | 2    | 64 | 2 | 2 | 2 |
| Data430 | 23.93 | 2    | 62 | 2 | 2 | 2 |
| Data431 | 21.05 | 1    | 66 | 2 | 1 | 1 |
| Data432 | 18.81 | 1    | 78 | 2 | 2 | 2 |
| Data433 | 20.08 | 2    | 47 | 2 | 2 | 2 |
| Data434 | 22.19 | 1    | 72 | 2 | 1 | 2 |
| Data435 | 20.58 | 2    | 42 | 2 | 2 | 2 |
| Data436 | 21.51 | 2    | 48 | 2 | 2 | 1 |

|         |       |      |    |   |   |   |
|---------|-------|------|----|---|---|---|
| Data437 | 25.39 | 1    | 53 | 1 | 2 | 1 |
| Data438 | 23.62 | 1    | 77 | 2 | 2 | 2 |
| Data439 | 20.45 | 2    | 51 | 2 | 2 | 2 |
| Data440 | 19.42 | 2    | 47 | 2 | 2 | 2 |
| Data441 |       | 2.00 | 49 | 2 | 2 | 2 |
| Data442 | 28.4  | 1    | 51 | 1 | 1 | 1 |
| Data443 | 21.5  | 2    | 54 | 2 | 2 | 2 |
| Data444 |       | 1    | 42 | 1 | 1 | 1 |
| Data445 | 25.71 | 1    | 48 | 2 | 1 | 1 |
| Data446 | 23.01 | 2    | 42 | 2 | 2 | 2 |
| Data447 | 28.34 | 1    | 64 | 1 | 1 | 2 |
| Data448 |       | 2    | 61 | 2 | 2 | 2 |
| Data449 | 20.03 | 2    | 39 | 2 | 2 | 2 |
| Data450 | 26.04 | 1    | 47 | 1 | 1 | 2 |
| Data451 | 25.96 | 2    | 49 | 2 | 2 | 2 |
| Data452 | 24.71 | 2    | 61 | 2 | 2 | 2 |
| Data453 | 23.34 | 2    | 62 | 2 | 2 | 1 |

| PGI    | PGII  | PGR   | G17   | Hp infection<br>(Yes,1;No,2) | Gastroscope   | Pathology of<br>gastric antral |
|--------|-------|-------|-------|------------------------------|---------------|--------------------------------|
| 136.00 | 8.80  | 15.45 | 0.10  | 2                            | Gastritis, DU | Inflammation                   |
| 118.09 | 9.53  | 12.39 | 1.35  | 2                            | Gastritis     | Inflammation                   |
| 111.00 | 5.80  | 19.14 | 0.80  | 2                            | Gastritis     | Inflammation                   |
| 120.00 | 6.00  | 20.00 | 1.20  | 2                            | Gastritis     | Inflammation                   |
| 133.00 | 3.00  | 11.00 | 3.00  | 1                            | Gastritis     | Inflammation                   |
| 69.05  | 5.14  | 13.42 | 1.10  | 2                            | Gastritis     | Inflammation                   |
| 354.00 | 24.00 | 14.75 | 0.40  | 2                            | Gastritis     | Inflammation                   |
| 65.50  | 9.40  | 6.97  | 26.98 | 1                            | Gastritis     | Inflammation                   |
| 240.00 | 30.00 | 8.00  | 9.00  | 1                            | Gastritis     | Inflammation                   |
| 317.00 | 50.00 | 6.34  | 2.00  | 1                            | Gastritis     | Inflammation                   |
| 259.00 | 14.70 | 17.62 | 0.90  | 1                            | Gastritis     | Inflammation                   |
| 59.78  | 9.46  | 6.32  | 0.50  | 2                            | Gastritis     | Inflammation                   |
| 54.54  | 12.50 | 4.36  | 18.43 | 1                            | Gastritis     | Inflammation                   |
| 200.00 | 15.00 | 13.33 | 4.40  | 1                            | Gastritis     | Inflammation                   |
| 54.72  | 4.71  | 11.62 | 0.85  | 1                            | Gastritis     | Inflammation                   |
| 93.00  | 12.00 | 7.75  | 0.50  | 1                            | Gastritis     | Inflammation                   |
| 169.00 | 25.00 | 6.76  | 0.60  | 1                            | Gastritis     | Inflammation                   |
| 205.00 | 22.00 | 9.32  | 1.30  | 2                            | Gastritis     | Inflammation                   |
| 137.00 | 17.00 | 8.06  | 0.10  | 2                            | Gastritis     | Inflammation                   |
| 105.31 | 15.26 | 6.90  | 5.61  | 1                            | Gastritis     | Inflammation                   |
| 102.50 | 21.27 | 4.82  | 1.91  | 1                            | Gastritis     | Inflammation                   |
| 92.73  | 13.37 | 6.94  | 9.13  | 1                            | Gastritis     | Inflammation                   |
| 144.66 | 10.48 | 10.94 | 1.31  | 1                            | Gastritis     | Inflammation                   |
| 147.00 | 14.00 | 10.50 | 1.50  | 1                            | Gastritis     | Inflammation                   |
| 117.32 | 18.86 | 6.22  | 5.17  | 1                            | Gastritis     | Inflammation                   |
| 124.63 | 15.44 | 8.07  | 63.54 | 1                            | Gastritis     | Inflammation                   |
| 66.00  | 9.00  | 7.33  | 0.40  | 1                            | Gastritis     | Inflammation                   |
| 144.81 | 15.93 | 9.09  | 2.25  | 1                            | Gastritis     | Inflammation                   |
| 112.93 | 14.83 | 7.62  | 6.67  | 1                            | Gastritis     | Inflammation                   |
| 107.00 | 5.50  | 19.45 | 1.00  | 2                            | Gastritis     | Inflammation                   |
| 43.59  | 3.60  | 12.11 | 0.63  | 2                            | Gastritis     | Inflammation                   |
| 61.96  | 4.32  | 14.36 | 1.13  | 2                            | Gastritis     | Inflammation                   |
| 149.00 | 24.30 | 6.13  | 3.40  | 2                            | Gastritis     | Inflammation                   |
| 159.00 | 6.90  | 23.04 | 0.10  | 2                            | Gastritis     | Inflammation                   |
| 75.00  | 7.00  | 10.71 | 0.10  | 2                            | Gastritis     | Inflammation                   |
| 308.91 | 28.53 | 10.83 | 35.88 | 2                            | Gastritis     | Inflammation                   |
| 87.00  | 15.00 | 5.80  | 1.50  | 2                            | Gastritis     | Inflammation                   |
| 100.00 | 7.50  | 13.33 | 0.60  | 2                            | Gastritis     | Inflammation                   |
| 306.00 | 40.00 | 7.76  | 85.00 | 2                            | Gastritis     | Inflammation                   |
| 296.00 | 21.00 | 14.10 | 0.10  | 2                            | Gastritis     | Inflammation                   |
| 195.00 | 12.00 | 16.25 | 3.60  | 1                            | Gastritis     | Inflammation                   |

|        |       |       |       |   |                              |              |
|--------|-------|-------|-------|---|------------------------------|--------------|
| 106.00 | 7.00  | 15.14 | 2.00  | 1 | Gastritis                    | Inflammation |
| 284.00 | 28.00 | 10.14 | 2.10  | 2 | Gastritis                    | Inflammation |
| 404.00 | 56.00 | 7.21  | 2.70  | 2 | Gastritis                    | Inflammation |
| 109.00 | 5.50  | 19.82 | 0.20  | 1 | Gastritis                    | Inflammation |
| 344.06 | 66.05 | 5.21  | 47.38 | 1 | Gastritis                    | Inflammation |
| 92.74  | 14.60 | 6.35  | 0.77  | 1 | Gastritis                    | Inflammation |
| 99.00  | 5.00  | 19.80 | 2.40  | 2 | Gastritis                    | Inflammation |
| 365.00 | 19.00 | 19.21 | 2.80  | 2 | Gastritis                    | Inflammation |
| 144.00 | 15.00 | 9.60  | 1.70  | 2 | Gastritis                    | Inflammation |
| 376.00 | 22.00 | 17.09 | 2.00  | 2 | Gastritis                    | Inflammation |
| 162.00 | 9.00  | 18.00 | 0.20  | 1 | Gastritis                    | Inflammation |
| 276.00 | 17.00 | 16.24 | 65.00 | 2 | Gastritis                    | Inflammation |
| 118.53 | 15.48 | 7.66  | 1.96  | 1 | Compound ulcer,<br>Gastritis | Inflammation |
| 90.68  | 6.60  | 13.74 | 0.86  | 2 | Gastritis                    | Inflammation |
| 224.00 | 35.00 | 6.40  | 21.00 | 1 | Gastritis                    | Inflammation |
| 127.00 | 15.00 | 8.47  | 0.40  | 2 | Gastritis                    | Inflammation |
| 141.91 | 17.04 | 8.33  | 4.27  | 1 | Gastritis                    | Inflammation |
| 110.00 | 7.00  | 15.71 | 1.00  | 2 | Gastritis                    | Inflammation |
| 684.00 | 27.00 | 75.33 | 7.00  | 1 | Gastritis                    | Inflammation |
| 224.38 | 35.43 | 6.33  | 7.28  | 1 | Gastritis                    | Inflammation |
| 142.39 | 23.10 | 6.16  | 11.61 | 1 | Gastritis                    | Inflammation |
| 86.00  | 5.00  | 17.20 | 2.40  | 1 | Gastritis                    | Inflammation |
| 146.70 | 29.94 | 4.90  | 18.75 | 1 | Gastritis                    | Inflammation |
| 142.00 | 18.00 | 7.89  | 0.50  | 1 | Gastritis                    | Inflammation |
| 101.00 | 10.00 | 10.10 | 0.20  | 1 | Gastritis                    | Inflammation |
| 224.00 | 30.00 | 7.47  | 0.40  | 1 | Gastritis                    | Inflammation |
| 64.00  | 5.00  | 12.80 | 1.00  | 2 | Gastritis                    | Inflammation |
| 167.00 | 9.00  | 18.56 | 0.10  | 2 | Gastritis                    | Inflammation |
| 103.00 | 10.00 | 10.30 | 0.10  | 2 | Gastritis                    | Inflammation |
| 65.59  | 4.80  | 13.67 | 0.93  | 2 | Gastritis                    | Inflammation |
| 85.00  | 7.00  | 12.14 | 0.80  | 2 | Gastritis                    | Inflammation |
| 165.00 | 20.00 | 8.25  | 0.10  | 2 | Gastritis                    | Inflammation |
| 187.70 | 22.30 | 8.40  | 10.00 | 2 | Gastritis                    | Inflammation |
| 78.00  | 11.00 | 7.09  | 0.10  | 2 | Gastritis                    | Inflammation |
| 153.00 | 17.50 | 8.74  | 12.70 | 2 | Gastritis                    | Inflammation |
| 123.00 | 6.30  | 19.52 | 0.10  | 2 | Gastritis                    | Inflammation |
| 117.04 | 12.00 | 9.75  | 5.18  | 1 | Gastritis                    | Inflammation |
| 280.39 | 20.30 | 13.82 | 22.59 | 2 | Gastritis                    | Inflammation |
| 152.00 | 6.50  | 23.38 | 0.90  | 2 | Gastritis                    | Inflammation |
| 130.00 | 10.00 | 13.00 | 2.70  | 2 | Gastritis                    | Inflammation |
| 143.43 | 21.40 | 6.70  | 19.75 | 1 | Gastritis                    | Inflammation |
| 137.70 | 20.69 | 6.66  | 9.92  | 1 | Gastritis                    | Inflammation |
| 123.36 | 16.41 | 7.52  | 1.61  | 1 | Gastritis                    | Inflammation |

|        |       |       |       |   |               |              |
|--------|-------|-------|-------|---|---------------|--------------|
| 97.52  | 14.02 | 6.96  | 1.13  | 1 | Gastritis     | Inflammation |
| 89.40  | 10.13 | 8.83  | 4.09  | 1 | Gastritis     | Inflammation |
| 99.60  | 14.15 | 7.04  | 13.30 | 1 | Gastritis     | Inflammation |
| 111.44 | 17.30 | 6.44  | 4.85  | 1 | Gastritis     | Inflammation |
| 137.53 | 15.47 | 8.89  | 2.43  | 1 | Gastritis     | Inflammation |
| 135.96 | 20.11 | 6.76  | 3.18  | 1 | Gastritis     | Inflammation |
| 77.00  | 3.90  | 19.40 | 0.10  | 2 | Gastritis     | Inflammation |
| 107.00 | 17.00 | 6.29  | 10.00 | 2 | Gastritis     | Inflammation |
| 138.38 | 17.29 | 8.00  | 12.97 | 1 | Gastritis, DU | Inflammation |
| 100.41 | 11.11 | 9.04  | 0.96  | 2 | DU            | Inflammation |
| 123.57 | 6.82  | 18.12 | 0.50  | 2 | DU            | Inflammation |
| 137.20 | 14.12 | 9.72  | 2.18  | 1 | DU            | Inflammation |
| 185.69 | 26.66 | 6.97  | 15.34 | 1 | Gastritis, DU | Inflammation |
| 214.00 | 38.00 | 5.63  | 21.00 | 1 | Gastritis     | Inflammation |
| 138.31 | 14.64 | 9.45  | 2.98  | 1 | Gastritis     | Inflammation |
| 162.64 | 17.97 | 9.05  | 11.96 | 1 | Gastritis     | Inflammation |
| 78.03  | 9.05  | 8.62  | 1.32  | 2 | Gastritis     | Inflammation |
| 115.06 | 9.43  | 12.20 | 1.24  | 2 | Gastritis     | Inflammation |
| 119.46 | 22.78 | 5.24  | 2.94  | 1 | Gastritis     | Inflammation |
| 337.98 | 63.23 | 5.35  | 44.46 | 1 | Gastritis     | Inflammation |
| 210.08 | 54.84 | 3.83  | 11.93 | 1 | Gastritis     | Inflammation |
| 66.33  | 16.12 | 4.11  | 10.48 | 1 | Gastritis     | Inflammation |
| 327.97 | 29.10 | 11.27 | 11.10 | 1 | Gastritis     | Inflammation |
| 140.14 | 19.08 | 7.35  | 7.13  | 1 | Gastritis     | Inflammation |
| 113.99 | 25.38 | 4.49  | 9.71  | 1 | Gastritis     | Inflammation |
| 117.20 | 17.38 | 6.74  | 8.68  | 1 | Gastritis     | Inflammation |
| 96.88  | 7.04  | 13.75 | 0.95  | 1 | Gastritis     | Inflammation |
| 108.68 | 18.94 | 5.74  | 4.04  | 1 | Gastritis     | Inflammation |
| 68.83  | 2.88  | 23.93 | 1.49  | 1 | Gastritis     | Inflammation |
| 193.42 | 26.88 | 7.19  | 14.04 | 1 | Gastritis     | Inflammation |
| 149.00 | 20.89 | 7.13  | 17.05 | 1 | Gastritis     | Inflammation |
| 100.31 | 10.00 | 10.03 | 1.83  | 2 | Gastritis     | Inflammation |
| 244.00 | 40.00 | 6.10  | 1.80  | 1 | Gastritis     | Inflammation |
| 87.29  | 5.92  | 14.75 | 0.95  | 2 | Gastritis     | Inflammation |
| 95.18  | 13.77 | 6.91  | 1.76  | 1 | GU            | Inflammation |
| 148.22 | 15.92 | 9.31  | 3.42  | 2 | GU            | Inflammation |
| 270.00 | 14.00 | 19.29 | 0.50  | 1 | Gastritis     | Inflammation |
| 113.80 | 19.30 | 5.90  | 3.31  | 1 | Gastritis     | Inflammation |
| 108.02 | 12.50 | 8.64  | 6.24  | 1 | Gastritis     | Inflammation |
| 60.81  | 10.25 | 5.93  | 1.84  | 1 | Gastritis     | Inflammation |
| 195.83 | 42.84 | 4.57  | 44.92 | 1 | Gastritis     | Inflammation |
| 160.72 | 21.07 | 7.63  | 8.96  | 1 | Gastritis     | Inflammation |
| 234.29 | 19.75 | 11.87 | 6.69  | 1 | Gastritis     | Inflammation |
| 82.24  | 12.47 | 6.60  | 2.14  | 1 | Gastritis     | Inflammation |

|        |       |       |       |   |               |              |
|--------|-------|-------|-------|---|---------------|--------------|
| 173.00 | 21.00 | 8.24  | 1.00  | 1 | Gastritis     | Inflammation |
| 130.38 | 13.02 | 10.01 | 7.36  | 1 | Gastritis     | Inflammation |
| 71.06  | 13.74 | 5.17  | 8.00  | 1 | Gastritis     | Inflammation |
| 162.67 | 17.67 | 9.21  | 7.40  | 1 | Gastritis     | Inflammation |
| 201.52 | 21.31 | 9.46  | 17.25 | 1 | Gastritis     | Inflammation |
| 65.57  | 5.75  | 11.40 | 1.79  | 1 | Gastritis     | Inflammation |
| 132.19 | 12.77 | 10.35 | 5.87  | 1 | Gastritis     | Inflammation |
| 102.97 | 12.71 | 8.11  | 8.03  | 1 | Gastritis     | Inflammation |
| 165.41 | 35.78 | 4.62  | 3.91  | 1 | Gastritis     | Inflammation |
| 117.39 | 17.43 | 6.74  | 6.01  | 1 | Gastritis     | Inflammation |
| 162.00 | 10.70 | 15.14 | 0.10  | 1 | Gastritis     | Inflammation |
| 118.26 | 27.55 | 4.29  | 4.10  | 1 | Gastritis     | Inflammation |
| 106.03 | 22.51 | 4.71  | 61.34 | 1 | Gastritis     | Inflammation |
| 136.47 | 14.52 | 9.40  | 6.52  | 1 | Gastritis     | Inflammation |
| 135.27 | 11.83 | 11.43 | 5.90  | 1 | Gastritis     | Inflammation |
| 97.77  | 12.21 | 8.01  | 3.46  | 1 | Gastritis     | Inflammation |
| 189.75 | 21.19 | 8.96  | 46.47 | 1 | Gastritis     | Inflammation |
| 105.55 | 11.88 | 8.89  | 1.38  | 1 | Gastritis     | Inflammation |
| 233.89 | 28.32 | 8.26  | 7.38  | 1 | Gastritis     | Inflammation |
| 58.53  | 9.05  | 6.47  | 0.84  | 2 | Gastritis     | Inflammation |
| 70.00  | 10.00 | 7.00  | 8.90  | 2 | Gastritis     | Inflammation |
| 64.40  | 4.95  | 13.01 | 1.68  | 2 | Gastritis     | Inflammation |
| 78.81  | 6.40  | 12.31 | 0.81  | 2 | Gastritis     | Inflammation |
| 43.57  | 7.87  | 5.54  | 1.09  | 2 | Gastritis     | Inflammation |
| 87.29  | 5.92  | 14.75 | 0.95  | 2 | Gastritis     | Inflammation |
| 131.94 | 8.54  | 15.44 | 1.52  | 2 | Gastritis     | Inflammation |
| 107.38 | 12.80 | 8.39  | 14.96 | 2 | Gastritis     | Inflammation |
| 71.40  | 4.72  | 15.13 | 2.61  | 2 | Gastritis     | Inflammation |
| 164.01 | 14.62 | 11.22 | 3.73  | 2 | Gastritis     | Inflammation |
| 132.97 | 7.96  | 16.70 | 0.76  | 2 | Gastritis     | Inflammation |
| 76.99  | 10.58 | 7.28  | 2.63  | 2 | Gastritis     | Inflammation |
| 250.82 | 50.38 | 4.98  | 19.93 | 2 | Gastritis     | Inflammation |
| 60.95  | 5.70  | 10.68 | 0.45  | 2 | Gastritis     | Inflammation |
| 57.13  | 4.52  | 12.65 | 1.07  | 2 | Gastritis     | Inflammation |
| 93.00  | 5.00  | 18.60 | 0.10  | 2 | Gastritis     | Inflammation |
| 99.07  | 4.79  | 20.81 | 0.92  | 2 | Gastritis     | Inflammation |
| 155.33 | 9.06  | 6.11  | 0.58  | 2 | Gastritis     | Inflammation |
| 265.00 | 14.00 | 18.93 | 7.50  | 2 | Gastritis     | Inflammation |
| 204.00 | 10.50 | 19.43 | 3.80  | 2 | Gastritis     | Inflammation |
| 207.00 | 21.00 | 9.86  | 20.00 | 2 | Gastritis     | Inflammation |
| 101.00 | 7.20  | 14.03 | 0.10  | 2 | Gastritis     | Inflammation |
| 106.18 | 15.68 | 6.77  | 9.48  | 1 | Gastritis, DU | Inflammation |
| 86.09  | 6.91  | 12.46 | 12.71 | 1 | Gastritis, DU | Inflammation |
| 106.00 | 5.70  | 18.60 | 4.80  | 2 | Gastritis     | Inflammation |

|        |       |       |       |   |                    |              |
|--------|-------|-------|-------|---|--------------------|--------------|
| 83.00  | 11.00 | 7.55  | 21.00 | 1 | Gastritis          | Inflammation |
| 80.16  | 26.49 | 3.03  | 13.53 | 1 | Gastritis          | Inflammation |
| 103.00 | 18.00 | 5.72  | 10.00 | 1 | Gastritis          | Inflammation |
| 190.00 | 12.80 | 14.84 | 0.60  | 1 | Gastritis          | Inflammation |
| 186.00 | 12.30 | 15.12 | 2.60  | 2 | Atrophic gastriyis | Inflammation |
| 98.00  | 5.90  | 16.61 | 85.00 | 1 | Atrophic gastriyis | Inflammation |
| 348.00 | 30.00 | 11.60 | 0.10  | 1 | Atrophic gastriyis | Atrophy      |
| 186.00 | 23.00 | 8.09  | 2.50  | 2 | Atrophic gastriyis | Atrophy      |
| 235.00 | 18.50 | 12.70 | 24.00 | 2 | Atrophic gastriyis | Atrophy      |
| 187.00 | 12.00 | 15.58 | 0.40  | 2 | Atrophic gastriyis | Atrophy      |
| 319.62 | 37.44 | 8.54  | 22.73 | 2 | Atrophic gastriyis | Atrophy      |
| 104.00 | 3.90  | 26.67 | 6.50  | 2 | Atrophic gastriyis | Atrophy      |
| 156.00 | 10.50 | 14.86 | 1.70  | 2 | Atrophic gastriyis | Atrophy      |
| 195.00 | 16.00 | 12.19 | 0.20  | 2 | Atrophic gastriyis | Atrophy      |
| 50.00  | 3.60  | 13.89 | 1.70  | 2 | Atrophic gastriyis | Atrophy      |
| 172.00 | 9.00  | 19.11 | 2.40  | 2 | Atrophic gastriyis | Atrophy      |
| 201.00 | 17.00 | 11.82 | 7.90  | 1 | Atrophic gastriyis | Atrophy      |
| 104.00 | 6.00  | 17.33 | 1.50  | 2 | Atrophic gastriyis | Inflammation |
| 125.00 | 10.50 | 11.90 | 4.60  | 1 | Atrophic gastriyis | Atrophy      |
| 46.00  | 3.30  | 14.38 | 0.40  | 2 | Atrophic gastriyis | Atrophy      |
| 238.00 | 20.00 | 11.90 | 25.00 | 2 | Atrophic gastriyis | Atrophy      |
| 301.00 | 16.00 | 18.81 | 13.60 | 1 | Atrophic gastriyis | Atrophy      |
| 346.00 | 75.00 | 4.61  | 10.50 | 1 | Atrophic gastriyis | Atrophy      |
| 275.00 | 55.00 | 5.00  | 14.00 | 1 | Atrophic gastriyis | Atrophy      |
| 152.00 | 7.00  | 21.71 | 2.60  | 1 | Atrophic gastriyis | Atrophy      |
| 259.56 | 58.20 | 5.08  | 23.47 | 1 | Atrophic gastriyis | Atrophy      |
| 171.00 | 8.70  | 19.66 | 0.30  | 1 | Atrophic gastriyis | Atrophy      |
| 124.00 | 5.60  | 22.14 | 0.20  | 1 | Atrophic gastriyis | Atrophy      |
| 203.00 | 15.80 | 12.85 | 0.70  | 2 | Atrophic gastriyis | Atrophy      |
| 163.00 | 10.00 | 16.30 | 0.60  | 2 | Atrophic gastriyis | Inflammation |
| 234.00 | 28.00 | 8.36  | 1.10  | 1 | Atrophic gastriyis | Atrophy      |
| 114.00 | 6.00  | 19.00 | 0.10  | 2 | Atrophic gastriyis | Atrophy      |
| 301.00 | 17.00 | 17.71 | 3.00  | 2 | Atrophic gastriyis | Atrophy      |
| 164.00 | 20.60 | 7.96  | 0.30  | 1 | Atrophic gastriyis | Atrophy      |
| 195.00 | 16.00 | 12.19 | 1.00  | 1 | Atrophic gastriyis | Atrophy      |
| 90.00  | 4.50  | 20.00 | 0.20  | 2 | Atrophic gastriyis | Atrophy      |
| 146.86 | 14.95 | 9.82  | 2.80  | 1 | complex ulcer      | Atrophy      |
| 200.00 | 16.00 | 12.50 | 1.30  | 1 | Atrophic gastriyis | Atrophy      |
| 175.00 | 25.00 | 7.00  | 1.60  | 1 | Atrophic gastriyis | Atrophy      |
| 262.00 | 15.40 | 17.01 | 4.20  | 2 | Atrophic gastriyis | Atrophy      |
| 181.00 | 16.00 | 11.31 | 1.30  | 2 | Atrophic gastriyis | Atrophy      |
| 177.33 | 41.66 | 4.26  | 31.56 | 2 | Atrophic gastriyis | Atrophy      |
| 105.00 | 5.30  | 19.81 | 0.10  | 2 | Atrophic gastriyis | Atrophy      |
| 181.00 | 25.00 | 7.24  | 1.20  | 1 | Atrophic gastriyis | Atrophy      |



|        |       |       |       |   |                        |              |
|--------|-------|-------|-------|---|------------------------|--------------|
| 159.89 | 35.99 | 4.44  | 19.47 | 1 | Atrophic gastritis     | Atrophy      |
| 145.00 | 8.00  | 18.13 | 2.40  | 2 | Atrophic gastritis     | Atrophy      |
| 231.00 | 23.00 | 10.04 | 0.10  | 1 | Atrophic gastritis     | Atrophy      |
| 201.00 | 10.50 | 19.14 | 3.50  | 2 | Atrophic gastritis     | Atrophy      |
| 62.57  | 2.67  | 23.44 | 1.45  | 2 | Atrophic gastritis     | Atrophy      |
| 192.00 | 10.00 | 19.20 | 10.80 | 1 | Atrophic gastritis     | Atrophy      |
| 147.13 | 14.73 | 9.99  | 5.63  | 1 | Atrophic gastritis     | Atrophy      |
| 179.00 | 13.30 | 13.46 | 0.20  | 2 | Atrophic gastritis     | Atrophy      |
| 138.00 | 20.00 | 6.90  | 20.00 | 1 | Atrophic gastritis     | Inflammation |
| 162.33 | 13.09 | 12.40 | 52.44 | 1 | Atrophic gastritis     | Atrophy      |
| 180.52 | 34.45 | 5.24  | 3.60  | 1 | Atrophic gastritis     | Atrophy      |
| 103.96 | 9.02  | 11.53 | 3.05  | 1 | Atrophic gastritis     | Atrophy      |
| 207.75 | 58.54 | 3.55  | 39.65 | 1 | Atrophic gastritis     | Atrophy      |
| 158.80 | 23.70 | 6.70  | 11.13 | 1 | Atrophic gastritis     | Atrophy      |
| 311.31 | 50.76 | 6.13  | 25.56 | 1 | Atrophic gastritis     | Atrophy      |
| 186.13 | 38.05 | 4.89  | 6.19  | 1 | Atrophic gastritis     | Atrophy      |
| 110.46 | 7.17  | 15.42 | 2.33  | 2 | Atrophic gastritis     | Atrophy      |
| 40.81  | 3.07  | 13.27 | 2.37  | 2 | Atrophic gastritis     | Inflammation |
| 76.90  | 6.60  | 11.66 | 0.41  | 2 | Atrophic gastritis     | Atrophy      |
| 340.65 | 40.76 | 8.36  | 15.48 | 2 | Atrophic gastritis     | Atrophy      |
| 60.37  | 4.74  | 12.73 | 2.47  | 2 | Atrophic gastritis, GU | Atrophy      |
| 259.00 | 10.00 | 25.90 | 0.10  | 1 | Atrophic gastritis, GU | Atrophy      |
| 170.60 | 22.27 | 7.66  | 5.92  | 1 | Atrophic gastritis, GU | Atrophy      |
| 84.47  | 5.53  | 15.27 | 3.85  | 1 | Atrophic gastritis     | Atrophy      |
| 149.57 | 20.80 | 7.19  | 7.38  | 1 | Atrophic gastritis     | Atrophy      |
| 204.98 | 33.31 | 6.15  | 4.89  | 1 | Atrophic gastritis     | Atrophy      |
| 171.00 | 13.96 | 12.25 | 5.77  | 1 | Atrophic gastritis     | Atrophy      |
| 55.17  | 3.89  | 14.18 | 1.23  | 2 | Atrophic gastritis     | Atrophy      |
| 53.04  | 4.73  | 11.21 | 2.13  | 2 | Atrophic gastritis     | Atrophy      |
| 58.51  | 4.85  | 12.06 | 0.82  | 2 | Atrophic gastritis     | Atrophy      |
| 273.20 | 23.48 | 11.63 | 6.96  | 2 | Atrophic gastritis     | Atrophy      |
| 71.85  | 6.02  | 11.94 | 1.08  | 2 | Atrophic gastritis     | Atrophy      |
| 169.43 | 17.53 | 9.66  | 1.88  | 2 | Atrophic gastritis     | Atrophy      |
| 62.35  | 4.68  | 13.33 | 0.74  | 2 | Atrophic gastritis     | Atrophy      |
| 132.17 | 12.93 | 10.23 | 9.20  | 2 | Atrophic gastritis     | Atrophy      |
| 117.61 | 8.64  | 13.61 | 1.63  | 2 | Atrophic gastritis     | Atrophy      |
| 214.03 | 20.24 | 10.57 | 7.30  | 2 | Atrophic gastritis     | Atrophy      |
| 169.00 | 22.00 | 7.68  | 2.10  | 1 | Atrophic gastritis     | Atrophy      |
| 148.00 | 26.72 | 5.54  | 12.63 | 1 | Atrophic gastritis     | Inflammation |
| 105.00 | 7.00  | 15.00 | 1.10  | 2 | Atrophic gastritis     | Atrophy      |
| 185.00 | 11.00 | 16.80 | 62.00 | 1 | Atrophic gastritis     | Atrophy      |
| 96.00  | 6.90  | 13.91 | 0.60  | 2 | Atrophic gastritis     | Atrophy      |
| 199.00 | 20.00 | 9.95  | 7.50  | 1 | Atrophic gastritis     | Atrophy      |
| 138.00 | 15.00 | 9.20  | 0.10  | 1 | Atrophic gastritis     | IM           |

|        |       |       |       |   |                       |              |
|--------|-------|-------|-------|---|-----------------------|--------------|
| 142.00 | 15.00 | 9.47  | 0.50  | 1 | Atrophic gastritis    | IM           |
| 137.00 | 17.00 | 8.06  | 8.40  | 1 | Atrophic gastritis    | IM           |
| 79.06  | 6.89  | 11.47 | 0.70  | 2 | Atrophic gastritis    | Dysplasia    |
| 171.08 | 32.93 | 5.20  | 1.37  | 1 | Atrophic gastritis    | IM           |
| 133.00 | 15.00 | 8.87  | 0.50  | 1 | Atrophic gastritis    | Dysplasia    |
| 160.00 | 13.70 | 11.68 | 0.10  | 1 | Atrophic gastritis    | IM           |
| 131.00 | 11.60 | 11.29 | 1.30  | 2 | Atrophic gastritis    | Atrophy      |
| 120.00 | 7.90  | 15.19 | 4.20  | 1 | Atrophic gastritis    | IM           |
| 127.00 | 8.30  | 15.30 | 0.50  | 2 | Atrophic gastritis    | IM           |
| 66.00  | 3.30  | 20.00 | 1.00  | 2 | Atrophic gastritis    | Inflammation |
| 122.82 | 29.13 | 4.22  | 1.14  | 1 | Atrophic gastritis    | IM           |
| 96.45  | 6.32  | 15.25 | 0.81  | 2 | Atrophic gastritis    | Dysplasia    |
| 44.58  | 3.27  | 13.62 | 0.73  | 2 | Atrophic gastritis    | Dysplasia    |
| 72.41  | 2.59  | 28.00 | 5.07  | 2 | Atrophic gastritis    | IM           |
| 86.00  | 6.70  | 12.84 | 0.10  | 2 | Atrophic gastritis    | IM           |
| 70.00  | 6.50  | 10.77 | 4.80  | 2 | Atrophic gastritis    | Dysplasia    |
| 131.53 | 7.50  | 4.07  | 68.38 | 1 | Atrophic gastritis    | IM           |
| 56.83  | 73.50 | 4.21  | 75.49 | 1 | Atrophic gastritis    | Dysplasia    |
| 170.00 | 17.00 | 10.00 | 0.10  | 2 | Atrophic gastritis    | IM           |
| 75.85  | 5.86  | 12.94 | 1.17  | 2 | Atrophic gastritis    | IM           |
| 72.78  | 7.64  | 9.53  | 1.12  | 2 | Atrophic gastritis    | Inflammation |
| 49.41  | 2.05  | 24.09 | 1.02  | 2 | Atrophic gastritis    | IM           |
| 93.41  | 9.45  | 9.89  | 2.81  | 2 | Atrophic gastritis    | IM           |
| 118.00 | 10.00 | 11.80 | 2.30  | 2 | Atrophic gastritis    | Atrophy      |
| 63.96  | 3.42  | 18.69 | 1.11  | 2 | Atrophic gastritis    | IM           |
| 100.00 | 12.00 | 8.33  | 1.60  | 2 | Atrophic gastritis    | Dysplasia    |
| 94.00  | 8.00  | 11.75 | 0.90  | 1 | Atrophic gastritis    | Atrophy      |
| 106.61 | 7.30  | 14.60 | 1.18  | 2 | Atrophic gastritis    | Atrophy      |
| 196.00 | 30.00 | 6.53  | 14.00 | 1 | Atrophic gastritis    | IM           |
| 121.85 | 34.08 | 3.57  | 3.57  | 1 | Atrophic gastritis    | IM           |
| 77.65  | 5.52  | 14.06 | 1.00  | 2 | Atrophic gastritis    | IM           |
| 147.53 | 15.57 | 9.48  | 6.84  | 1 | Atrophic gastritis,DU | IM           |
| 285.00 | 25.00 | 11.40 | 4.80  | 1 | Atrophic gastritis    | IM           |
| 85.97  | 10.99 | 7.82  | 3.12  | 1 | Atrophic gastritis    | IM           |
| 98.32  | 11.41 | 8.61  | 1.99  | 1 | Atrophic gastritis    | Dysplasia    |
| 192.00 | 15.40 | 12.47 | 2.20  | 1 | Atrophic gastritis    | IM           |
| 170.00 | 17.00 | 10.00 | 2.00  | 2 | Atrophic gastritis    | Inflammation |
| 60.00  | 6.00  | 12.00 | 0.20  | 1 | Atrophic gastritis    | IM           |
| 107.07 | 11.03 | 9.26  | 5.13  | 1 | Atrophic gastritis    | IM           |
| 115.00 | 8.00  | 14.38 | 0.10  | 1 | Atrophic gastritis    | Inflammation |
| 121.00 | 15.00 | 8.07  | 3.00  | 1 | Atrophic gastritis    | Atrophy      |
| 100.00 | 14.51 | 6.89  | 1.80  | 1 | Atrophic gastritis    | Dysplasia    |
| 200.00 | 19.00 | 10.53 | 4.00  | 1 | Atrophic gastritis    | Atrophy      |
| 147.00 | 13.70 | 10.37 | 0.10  | 1 | Atrophic gastritis    | Dysplasia    |

|        |       |       |       |   |                       |              |
|--------|-------|-------|-------|---|-----------------------|--------------|
| 30.00  | 2.50  | 12.00 | 1.50  | 1 | Atrophic gastritis    | Atrophy      |
| 133.00 | 21.00 | 6.33  | 2.70  | 1 | Atrophic gastritis    | IM           |
| 126.02 | 13.43 | 9.38  | 4.32  | 1 | Atrophic gastritis,DU | Atrophy      |
| 108.60 | 7.99  | 13.59 | 8.42  | 1 | Atrophic gastritis,DU | IM           |
| 97.94  | 12.10 | 8.10  | 11.71 | 1 | Atrophic gastritis,DU | IM           |
| 126.97 | 14.16 | 8.97  | 4.50  | 2 | Atrophic gastritis,DU | Dysplasia    |
| 121.00 | 11.60 | 10.43 | 0.10  | 1 | Atrophic gastritis    | Dysplasia    |
| 130.00 | 10.00 | 13.00 | 3.20  | 1 | Atrophic gastritis    | IM           |
| 128.48 | 20.18 | 6.37  | 5.01  | 1 | Atrophic gastritis    | IM           |
| 99.44  | 3.75  | 26.50 | 1.68  | 2 | Atrophic gastritis    | IM           |
| 67.00  | 8.00  | 8.38  | 15.00 | 1 | Atrophic gastritis    | IM           |
| 73.44  | 7.47  | 9.83  | 1.01  | 2 | Atrophic gastritis    | IM           |
| 72.00  | 14.70 | 4.92  | 0.10  | 1 | Atrophic gastritis    | IM           |
| 160.61 | 53.15 | 3.02  | 37.79 | 1 | Atrophic gastritis    | IM           |
| 119.19 | 17.63 | 6.76  | 3.74  | 1 | Atrophic gastritis    | Dysplasia    |
| 102.04 | 13.70 | 7.45  | 9.96  | 1 | Atrophic gastritis    | Dysplasia    |
| 130.67 | 22.56 | 5.79  | 5.71  | 1 | Atrophic gastritis    | Atrophy      |
| 124.74 | 14.94 | 8.35  | 4.10  | 1 | Atrophic gastritis    | IM           |
| 97.42  | 7.67  | 12.70 | 3.17  | 1 | Atrophic gastritis    | IM           |
| 113.58 | 19.65 | 5.78  | 5.47  | 1 | Atrophic gastritis    | IM           |
| 103.26 | 17.27 | 5.98  | 5.80  | 1 | Atrophic gastritis    | Atrophy      |
| 109.28 | 17.69 | 6.18  | 2.46  | 1 | Atrophic gastritis    | Inflammation |
| 112.79 | 14.74 | 7.65  | 7.00  | 1 | Atrophic gastritis    | IM           |
| 101.90 | 20.50 | 5.08  | 4.28  | 1 | Atrophic gastritis    | Atrophy      |
| 109.59 | 14.97 | 7.32  | 3.06  | 1 | Atrophic gastritis    | Dysplasia    |
| 119.89 | 16.81 | 7.13  | 5.27  | 1 | Atrophic gastritis    | Atrophy      |
| 145.25 | 21.94 | 6.62  | 2.41  | 1 | Atrophic gastritis    | IM           |
| 115.23 | 20.30 | 5.68  | 11.40 | 1 | Atrophic gastritis    | Dysplasia    |
| 120.88 | 12.45 | 9.71  | 5.77  | 1 | Atrophic gastritis    | Atrophy      |
| 147.25 | 25.30 | 5.82  | 11.35 | 1 | Atrophic gastritis    | IM           |
| 180.13 | 30.31 | 5.94  | 3.97  | 1 | Atrophic gastritis    | IM           |
| 163.81 | 15.13 | 10.82 | 1.10  | 2 | Atrophic gastritis    | IM           |
| 112.01 | 13.36 | 8.38  | 2.44  | 2 | Atrophic gastritis    | IM           |
| 176.31 | 30.31 | 5.82  | 24.79 | 2 | Atrophic gastritis    | IM           |
| 59.76  | 4.97  | 12.02 | 4.88  | 2 | Atrophic gastritis    | IM           |
| 81.61  | 3.23  | 25.27 | 7.32  | 2 | Atrophic gastritis    | IM           |
| 187.09 | 12.06 | 15.51 | 2.30  | 2 | Atrophic gastritis    | IM           |
| 151.69 | 12.46 | 12.17 | 3.10  | 2 | Atrophic gastritis    | Dysplasia    |
| 64.48  | 5.21  | 12.39 | 3.15  | 2 | Atrophic gastritis    | Dysplasia    |
| 88.70  | 6.81  | 13.03 | 1.00  | 2 | Atrophic gastritis    | IM           |
| 86.86  | 5.57  | 15.60 | 1.23  | 2 | Atrophic gastritis    | IM           |
| 127.96 | 22.48 | 5.69  | 18.13 | 2 | Atrophic gastritis    | IM           |
| 76.08  | 8.80  | 8.65  | 8.28  | 2 | Atrophic gastritis    | IM           |
| 139.00 | 12.00 | 11.58 | 1.00  | 1 | Atrophic gastritis,GU | IM           |

|        |       |       |       |   |                    |              |
|--------|-------|-------|-------|---|--------------------|--------------|
| 97.80  | 7.14  | 13.69 | 2.28  | 2 | Atrophic gastritis | IM           |
| 90.34  | 8.08  | 11.18 | 2.32  | 1 | Atrophic gastritis | IM           |
| 110.28 | 12.54 | 8.79  | 5.10  | 1 | Atrophic gastritis | IM           |
| 114.52 | 14.73 | 7.77  | 5.77  | 1 | Atrophic gastritis | IM           |
| 183.06 | 22.20 | 8.25  | 8.90  | 1 | Atrophic gastritis | IM           |
| 71.05  | 3.20  | 22.20 | 2.70  | 1 | Atrophic gastritis | Inflammation |
| 159.23 | 21.01 | 7.58  | 2.54  | 1 | Atrophic gastritis | IM           |
| 106.03 | 12.24 | 8.66  | 7.51  | 1 | Atrophic gastritis | Atrophy      |
| 138.06 | 13.69 | 10.09 | 4.54  | 1 | Atrophic gastritis | Atrophy      |
| 131.00 | 25.00 | 5.24  | 32.00 | 1 | Atrophic gastritis | Inflammation |
| 144.14 | 19.54 | 7.38  | 5.08  | 1 | Atrophic gastritis | Dysplasia    |
| 118.46 | 32.00 | 3.70  | 3.22  | 1 | Atrophic gastritis | Dysplasia    |
| 145.13 | 19.59 | 7.41  | 32.04 | 1 | Atrophic gastritis | Dysplasia    |
| 40.29  | 2.52  | 16.01 | 5.30  | 2 | Atrophic gastritis | IM           |
| 65.98  | 3.33  | 19.84 | 1.01  | 2 | Atrophic gastritis | IM           |
| 100.00 | 8.00  | 12.50 | 8.90  | 2 | Atrophic gastritis | Dysplasia    |
| 57.47  | 3.01  | 19.07 | 2.36  | 2 | Atrophic gastritis | Dysplasia    |
| 204.86 | 24.32 | 8.42  | 2.66  | 2 | Atrophic gastritis | IM           |
| 82.22  | 7.15  | 11.50 | 1.75  | 2 | Atrophic gastritis | Atrophy      |
| 124.44 | 6.76  | 18.42 | 1.82  | 2 | Atrophic gastritis | Atrophy      |
| 74.01  | 6.29  | 11.77 | 0.86  | 2 | Atrophic gastritis | IM           |
| 148.98 | 14.99 | 9.94  | 9.75  | 2 | Atrophic gastritis | IM           |
| 55.54  | 4.72  | 11.76 | 0.94  | 2 | Atrophic gastritis | Atrophy      |
| 72.31  | 4.63  | 15.61 | 3.38  | 2 | Atrophic gastritis | IM           |
| 100.96 | 22.50 | 4.49  | 18.11 | 2 | Atrophic gastritis | IM           |
| 107.00 | 17.00 | 6.29  | 0.85  | 2 | Atrophic gastritis | IM           |
| 63.21  | 2.82  | 22.41 | 7.82  | 2 | Atrophic gastritis | Atrophy      |
| 85.89  | 7.25  | 11.85 | 2.20  | 2 | Atrophic gastritis | IM           |
| 112.70 | 12.73 | 8.85  | 11.18 | 2 | Atrophic gastritis | Atrophy      |
| 143.00 | 20.00 | 7.15  | 0.60  | 2 | Atrophic gastritis | IM           |
| 62.73  | 3.24  | 19.36 | 2.30  | 2 | Atrophic gastritis | Inflammation |
| 124.59 | 10.99 | 11.33 | 1.42  |   | Atrophic gastritis | Atrophy      |
| 125.00 | 7.50  | 16.67 | 0.70  | 1 | Atrophic gastritis | Atrophy      |
| 131.00 | 30.00 | 4.37  | 0.10  | 1 | Atrophic gastritis | Atrophy      |
| 107.25 | 16.99 | 6.31  | 4.14  | 1 | Atrophic gastritis | IM           |
| 59.00  | 6.30  | 9.37  | 22.00 | 2 | Atrophic gastritis | IM           |
| 60.43  | 3.61  | 16.75 | 1.52  | 2 | Atrophic gastritis | Dysplasia    |
| 65.00  | 9.00  | 7.22  | 0.10  | 2 | Atrophic gastritis | Inflammation |
| 90.00  | 15.00 | 6.00  | 0.10  | 1 | Atrophic gastritis | IM           |
| 69.32  | 11.17 | 6.13  | 5.47  | 2 | Atrophic gastritis | Dysplasia    |
| 115.00 | 22.00 | 5.23  | 10.00 | 2 | Atrophic gastritis | IM           |
| 48.20  | 5.64  | 8.55  | 0.80  | 2 | Atrophic gastritis | IM           |
| 60.00  | 7.00  | 8.57  | 0.10  | 2 | Atrophic gastritis | IM           |
| 60.50  | 10.40 | 5.80  | 18.50 | 1 | Atrophic gastritis | IM           |

|        |       |       |       |   |                    |           |
|--------|-------|-------|-------|---|--------------------|-----------|
| 66.98  | 8.70  | 7.70  | 0.81  | 2 | Atrophic gastritis | Dysplasia |
| 126.30 | 17.36 | 7.28  | 1.20  | 1 | Atrophic gastritis | Atrophy   |
| 70.00  | 11.00 | 8.36  | 1.30  | 1 | Atrophic gastritis | Dysplasia |
| 80.70  | 2.89  | 6.40  | 11.70 | 1 | Atrophic gastritis | Dysplasia |
| 64.27  | 7.03  | 9.14  | 1.22  | 2 | Atrophic gastritis | Dysplasia |
| 78.00  | 9.70  | 8.04  | 0.10  | 2 | Atrophic gastritis | IM        |
| 71.00  | 9.00  | 7.89  | 1.00  | 2 | Atrophic gastritis | IM        |
| 62.24  | 10.45 | 5.95  | 3.76  | 1 | Atrophic gastritis | Dysplasia |
| 86.00  | 13.00 | 6.62  | 0.50  | 2 | Atrophic gastritis | IM        |
| 50.00  | 10.22 | 4.89  | 1.50  | 1 | Atrophic gastritis | IM        |
| 68.94  | 12.96 | 5.32  | 0.95  | 2 | Atrophic gastritis | Atrophy   |
| 104.00 | 6.00  | 17.33 | 18.00 | 2 | Atrophic gastritis | IM        |
| 147.69 | 25.23 | 5.85  | 5.06  | 1 | Atrophic gastritis | Dysplasia |
| 65.73  | 3.70  | 17.74 | 7.24  | 2 | Atrophic gastritis | IM        |
| 85.58  | 7.97  | 10.74 | 4.93  | 1 | Atrophic gastritis | Dysplasia |
| 68.34  | 6.85  | 9.98  | 3.08  | 1 | Atrophic gastritis | Atrophy   |
| 113.91 | 16.53 | 6.89  | 6.94  | 1 | Atrophic gastritis | IM        |
| 80.39  | 9.78  | 8.22  | 0.85  | 1 | Atrophic gastritis | IM        |
| 123.66 | 29.37 | 4.21  | 6.83  | 2 | Atrophic gastritis | IM        |
| 64.58  | 9.41  | 6.87  | 0.80  | 2 | Atrophic gastritis | Atrophy   |
| 62.64  | 4.41  | 14.22 | 2.54  | 2 | Atrophic gastritis | Dysplasia |
| 62.16  | 4.01  | 15.51 | 1.20  | 2 | Atrophic gastritis | IM        |
| 87.61  | 10.15 | 8.63  | 2.32  | 2 | Atrophic gastritis | Dysplasia |
| 183.36 | 39.76 | 4.61  | 17.97 | 1 | GU                 | Dysplasia |
| 95.09  | 13.58 | 7.00  | 5.40  | 1 | Atrophic gastritis | IM        |
| 85.76  | 18.07 | 4.75  | 11.77 | 1 | Atrophic gastritis | IM        |
| 63.25  | 10.07 | 6.28  | 15.38 | 1 | Atrophic gastritis | Dysplasia |
| 84.50  | 11.78 | 7.17  | 1.68  | 1 | Atrophic gastritis | Dysplasia |
| 71.31  | 9.04  | 7.89  | 1.40  | 1 | Atrophic gastritis | IM        |
| 92.55  | 24.99 | 3.70  | 35.33 | 2 | Atrophic gastritis | IM        |
| 76.14  | 5.76  | 13.23 | 0.95  | 2 | Atrophic gastritis | Dysplasia |
| 53.66  | 2.22  | 24.20 | 1.69  | 2 | Atrophic gastritis | IM        |
| 63.06  | 4.90  | 12.87 | 1.03  | 2 | Atrophic gastritis | IM        |
| 101.36 | 8.46  | 11.99 | 0.72  | 2 | Atrophic gastritis | Dysplasia |
| 62.41  | 6.19  | 10.08 | 8.22  | 2 | Atrophic gastritis | IM        |
| 37.38  | 5.09  | 7.34  | 4.39  | 2 | Atrophic gastritis | Dysplasia |
| 70.86  | 8.98  | 7.89  | 37.53 | 2 | Atrophic gastritis | Dysplasia |
| 89.50  | 13.65 | 6.56  | 1.32  | 2 | Atrophic gastritis | Dysplasia |
| 51.00  | 11.00 | 4.64  | 2.70  | 1 | Atrophic gastritis | Dysplasia |
| 63.36  | 17.77 | 3.56  | 0.10  | 1 | Atrophic gastritis | Dysplasia |
| 45.69  | 7.41  | 6.17  | 19.40 | 2 | Atrophic gastritis | Dysplasia |
| 87.31  | 28.93 | 3.02  | 17.28 | 1 | Atrophic gastritis | Dysplasia |
| 63.00  | 9.47  | 6.64  | 1.26  | 1 | Atrophic gastritis | Dysplasia |
| 56.97  | 12.07 | 4.72  | 16.53 | 1 | Atrophic gastritis | Dysplasia |

|        |       |      |       |   |                        |           |
|--------|-------|------|-------|---|------------------------|-----------|
| 52.00  | 10.00 | 5.20 | 0.10  | 2 | Atrophic gastritis     | Dysplasia |
| 80.26  | 17.62 | 4.56 | 18.05 | 1 | Atrophic gastritis     | IM        |
| 76.00  | 13.00 | 5.85 | 0.10  | 2 | Atrophic gastritis     | Dysplasia |
| 54.85  | 12.11 | 4.53 | 9.52  | 1 | Atrophic gastritis     | Dysplasia |
| 105.10 | 25.57 | 4.11 | 3.02  | 1 | Atrophic gastritis     | Dysplasia |
| 55.99  | 20.87 | 2.68 | 55.90 | 1 | Atrophic gastritis     | Dysplasia |
| 148.99 | 25.95 | 5.74 | 13.74 | 2 | Atrophic gastritis     | Dysplasia |
| 35.71  | 13.81 | 2.59 | 1.58  | 1 | Atrophic gastritis, GU | IM        |
| 50.94  | 12.24 | 4.16 | 16.73 | 2 | Atrophic gastritis     | Dysplasia |
| 39.06  | 7.67  | 5.09 | 4.18  | 1 | Atrophic gastritis     | Dysplasia |
| 51.84  | 24.12 | 2.15 | 1.41  | 1 | Atrophic gastritis     | Dysplasia |
| 42.17  | 8.20  | 5.14 | 6.17  | 1 | Atrophic gastritis     | Dysplasia |
| 40.75  | 6.52  | 6.25 | 0.10  | 2 | Atrophic gastritis     | Dysplasia |
| 74.15  | 10.38 | 7.14 | 1.41  | 2 | Atrophic gastritis     | Dysplasia |
| 44.64  | 5.46  | 8.17 | 10.04 | 2 | Atrophic gastritis     | Dysplasia |
| 53.35  | 8.65  | 6.17 | 4.27  | 2 | Atrophic gastritis     | Atrophy   |
| 38.27  | 27.06 | 1.41 | 58.78 | 1 | Atrophic gastritis     | Dysplasia |











|              |   |
|--------------|---|
| Inflammation | 0 |
| Inflammation | 0 |
| Inflammation | 0 |
| Inflammation | 0 |
| Atrophy      | 1 |
| Atrophy      | 1 |
| Inflammation | 1 |
| Inflammation | 1 |
| Inflammation | 1 |
| Inflammation | 1 |
| Atrophy      | 1 |
| Inflammation | 1 |
| Inflammation | 1 |
| Inflammation | 1 |
| Inflammation | 1 |
| Inflammation | 1 |
| Atrophy      | 1 |
| Atrophy      | 1 |
| Atrophy      | 1 |
| Inflammation | 1 |
| Inflammation | 1 |
| Inflammation | 1 |
| Inflammation | 1 |
| Atrophy      | 1 |
| Atrophy      | 1 |
| Inflammation | 1 |
| Inflammation | 1 |
| Inflammation | 1 |
| Inflammation | 1 |
| Atrophy      | 1 |
| Inflammation | 1 |
| Inflammation | 1 |
| Atrophy      | 1 |
| Inflammation | 1 |
| Atrophy      | 1 |
| Inflammation | 1 |
| Inflammation | 1 |
| Inflammation | 1 |
| Inflammation | 1 |
| Atrophy      | 1 |
| Inflammation | 1 |
| Atrophy      | 1 |
| Inflammation | 1 |
| Inflammation | 1 |
| Inflammation | 1 |
| Inflammation | 1 |
| Inflammation | 1 |

|              |   |
|--------------|---|
| Atrophy      | 1 |
| Inflammation | 1 |
| Atrophy      | 1 |
| Atrophy      | 1 |
| Inflammation | 1 |
| Atrophy      | 1 |
| Inflammation | 1 |
| Inflammation | 1 |
| Atrophy      | 1 |
| Inflammation | 1 |
| Inflammation | 1 |
| Atrophy      | 1 |
| Inflammation | 1 |
| Inflammation | 1 |
| Inflammation | 1 |
| Atrophy      | 1 |
| Atrophy      | 1 |
| Atrophy      | 1 |
| Atrophy      | 1 |
| Inflammation | 1 |
| Inflammation | 1 |
| Inflammation | 1 |
| Inflammation | 1 |
| Atrophy      | 1 |
| Atrophy      | 1 |
| Inflammation | 1 |
| Atrophy      | 1 |
| Inflammation | 1 |
| Atrophy      | 1 |
| Atrophy      | 1 |
| Inflammation | 1 |
| Atrophy      | 1 |
| Atrophy      | 1 |
| Atrophy      | 1 |
| Atrophy      | 1 |
| Atrophy      | 1 |
| Atrophy      | 1 |
| Atrophy      | 1 |
| Atrophy      | 1 |
| Atrophy      | 1 |
| Atrophy      | 1 |
| Atrophy      | 1 |
| Atrophy      | 1 |
| Inflammation | 1 |
| Atrophy      | 1 |
| Atrophy      | 2 |
| IM           | 2 |
| Inflammation | 2 |

|              |   |
|--------------|---|
| Atrophy      | 2 |
| Inflammation | 2 |
| Inflammation | 2 |
| Inflammation | 2 |
| Inflammation | 2 |
| Atrophy      | 2 |
| Inflammation | 2 |
| Inflammation | 2 |
| Inflammation | 2 |
| Dysplasia    | 2 |
| Inflammation | 2 |
| Inflammation | 2 |
| Inflammation | 2 |
| Dysplasia    | 2 |
| Atrophy      | 2 |
| Inflammation | 2 |
| Atrophy      | 2 |
| Inflammation | 2 |
| Atrophy      | 2 |
| Atrophy      | 2 |
| IM           | 2 |
| Inflammation | 2 |
| IM           | 2 |
| Inflammation | 2 |
| Inflammation | 2 |
| Inflammation | 2 |
| Atrophy      | 2 |
| Atrophy      | 2 |
| Atrophy      | 2 |
| Dysplasia    | 2 |
| Inflammation | 2 |
| IM           | 2 |
| Inflammation | 2 |
| Atrophy      | 2 |
| Atrophy      | 2 |
| Inflammation | 2 |
| Dysplasia    | 2 |
| IM           | 2 |
| Inflammation | 2 |
| Dysplasia    | 2 |
| Inflammation | 2 |
| Inflammation | 2 |
| Atrophy      | 2 |
| Atrophy      | 2 |

|              |   |
|--------------|---|
| Atrophy      | 2 |
| IM           | 2 |
| Inflammation | 2 |
| IM           | 2 |
| Atrophy      | 2 |
| Inflammation | 2 |
| Inflammation | 2 |
| Atrophy      | 2 |
| Inflammation | 2 |
| IM           | 2 |
| Inflammation | 2 |
| Inflammation | 2 |
| IM           | 2 |
| Inflammation | 2 |
| Inflammation | 2 |
| Inflammation | 2 |
| Atrophy      | 2 |
| IM           | 2 |
| Inflammation | 2 |
| Atrophy      | 2 |
| Atrophy      | 2 |
| IM           | 2 |
| IM           | 2 |
| IM           | 2 |
| Inflammation | 2 |
| Atrophy      | 2 |
| Inflammation | 2 |
| Inflammation | 2 |
| Atrophy      | 2 |
| Inflammation | 2 |
| Inflammation | 2 |
| Atrophy      | 2 |
| Inflammation | 2 |
| Inflammation | 2 |
| Inflammation | 2 |
| Inflammation | 2 |
| IM           | 2 |
| Inflammation | 2 |
| Inflammation | 2 |
| Atrophy      | 2 |
| Atrophy      | 2 |
| Inflammation | 2 |
| Inflammation | 2 |
| Atrophy      | 2 |

|              |   |
|--------------|---|
| Atrophy      | 2 |
| Inflammation | 2 |
| IM           | 2 |
| Inflammation | 2 |
| Inflammation | 2 |
| Atrophy      | 2 |
| Atrophy      | 2 |
| Inflammation | 2 |
| Atrophy      | 2 |
| Dysplasia    | 2 |
| Inflammation | 2 |
| Inflammation | 2 |
| Inflammation | 2 |
| Inflammation | 2 |
| Inflammation | 2 |
| Inflammation | 2 |
| Inflammation | 2 |
| IM           | 2 |
| Atrophy      | 2 |
| IM           | 2 |
| Atrophy      | 2 |
| Inflammation | 2 |
| Atrophy      | 2 |
| Inflammation | 2 |
| Inflammation | 2 |
| Inflammation | 2 |
| Atrophy      | 2 |
| Inflammation | 2 |
| Atrophy      | 2 |
| Inflammation | 2 |
| IM           | 2 |
| Atrophy      | 2 |
| Atrophy      | 2 |
| Atrophy      | 2 |
| Atrophy      | 2 |
| Atrophy      | 2 |
| Atrophy      | 3 |
| Atrophy      | 3 |
| IM           | 3 |
| Inflammation | 3 |
| Atrophy      | 3 |
| Inflammation | 3 |
| Inflammation | 3 |
| IM           | 3 |
| Atrophy      | 3 |

|              |   |
|--------------|---|
| Inflammation | 3 |
| Atrophy      | 3 |
| Atrophy      | 3 |
| Inflammation | 3 |
| Atrophy      | 3 |
| Atrophy      | 3 |
| Atrophy      | 3 |
| Atrophy      | 3 |
| Inflammation | 3 |
| Atrophy      | 3 |
| Atrophy      | 3 |
| Atrophy      | 3 |
| Inflammation | 3 |
| IM           | 3 |
| Inflammation | 3 |
| Atrophy      | 3 |
| Atrophy      | 3 |
| Inflammation | 3 |
| Atrophy      | 3 |
| Atrophy      | 3 |
| Atrophy      | 3 |
| IM           | 3 |
| Atrophy      | 3 |
| Inflammation | 3 |
| Atrophy      | 3 |
| Inflammation | 3 |
| Inflammation | 3 |
| Inflammation | 3 |
| Atrophy      | 3 |
| Atrophy      | 3 |
| Inflammation | 3 |
| Atrophy      | 3 |
| IM           | 3 |
| Inflammation | 3 |
| Atrophy      | 3 |
| IM           | 3 |
| Inflammation | 3 |
| Atrophy      | 3 |
| IM           | 4 |
| Dysplasia    | 4 |
| Atrophy      | 4 |
| IM           | 4 |
| Dysplasia    | 4 |
| Atrophy      | 4 |



|           |   |
|-----------|---|
| Dysplasia | 4 |
| IM        | 4 |
| Dysplasia | 4 |
| Dysplasia | 4 |
| Dysplasia | 4 |
| Dysplasia | 4 |
| IM        | 4 |
| IM        | 4 |
| Dysplasia | 4 |
| Dysplasia | 4 |
| IM        | 4 |
| IM        | 4 |
| Dysplasia | 4 |
| IM        | 4 |
| IM        | 4 |
| GC        | 4 |
| IM        | 4 |
